# Supplementary material for: Rapid Detection of Adulterants in Whey Protein Supplement by Raman Spectroscopy Combined with Multivariate Analysis
Source: MDPI journal article supplement (doi:10.3390/molecules24101889), 2019-05-16
Supplement: s1 [file s1]

**Table S1.** Composition of 32 WPC samples used in the experiment.

| Sample number | Creatine (%) | Glutamine (%) | Taurine (%) | WPC (%) |
|---------------|--------------|---------------|-------------|---------|
| 1             | 1.00         | 0.00          | 0.00        | 99.00   |
| 2             | 2.00         | 0.00          | 0.00        | 98.00   |
| 3             | 3.00         | 0.00          | 0.00        | 97.00   |
| 4             | 4.00         | 0.00          | 0.00        | 96.00   |
| 5             | 5.00         | 0.00          | 0.00        | 95.00   |
| 6             | 0.00         | 1.67          | 0.00        | 98.33   |
| 7             | 0.00         | 3.34          | 0.00        | 96.66   |
| 8             | 0.00         | 5.01          | 0.00        | 94.99   |
| 9             | 0.00         | 6.68          | 0.00        | 93.32   |
| 10            | 0.00         | 8.35          | 0.00        | 91.65   |
| 11            | 0.00         | 0.00          | 2.86        | 97.14   |
| 12            | 0.00         | 0.00          | 5.72        | 94.28   |
| 13            | 0.00         | 0.00          | 8.58        | 91.42   |
| 14            | 0.00         | 0.00          | 11.44       | 88.56   |
| 15            | 0.00         | 0.00          | 14.29       | 85.71   |
| 16            | 0.50         | 0.83          | 0.00        | 98.67   |
| 17            | 1.00         | 1.67          | 0.00        | 97.33   |
| 18            | 1.50         | 2.50          | 0.00        | 96.00   |
| 19            | 2.00         | 3.34          | 0.00        | 94.66   |
| 20            | 2.50         | 4.17          | 0.00        | 93.33   |
| 21            | 0.50         | 0.00          | 1.43        | 98.07   |
| 22            | 1.00         | 0.00          | 2.86        | 96.14   |
| 23            | 1.50         | 0.00          | 4.29        | 94.21   |
| 24            | 2.00         | 0.00          | 5.72        | 92.28   |
| 25            | 2.50         | 0.00          | 7.15        | 90.35   |
| 26            | 0.00         | 0.83          | 1.43        | 97.74   |
| 27            | 0.00         | 1.67          | 2.86        | 95.47   |
| 28            | 0.00         | 2.50          | 4.29        | 93.21   |
| 29            | 0.00         | 3.34          | 5.72        | 90.94   |
| 30            | 0.00         | 4.17          | 7.15        | 88.68   |
| 31            | 0.00         | 0.00          | 0.00        | 100     |
| 32            | 0.00         | 0.00          | 0.00        | 100     |

**Table S2.** Classification predictions results and number of components of Partial least squares discriminant analysis (PLS-DA) model with full-spectra.

|                            | Members | Correct | W | WC | WG | WT | WCG | WCT | WTG | No<br>class |
|----------------------------|---------|---------|---|----|----|----|-----|-----|-----|-------------|
| Number of latent variables |         |         |   |    |    |    |     |     |     |             |
| 8                          |         |         |   |    |    |    |     |     |     |             |
| Training set               |         |         |   |    |    |    |     |     |     |             |
| W                          | 7       | 100%    | 7 | 0  | 0  | 0  | 0   | 0   | 0   | 0           |
| WC                         | 20      | 95%     | 0 | 19 | 0  | 0  | 1   | 0   | 0   | 0           |
| WG                         | 20      | 85%     | 0 | 0  | 17 | 0  | 3   | 0   | 0   | 0           |
| WT                         | 20      | 95%     | 0 | 0  | 0  | 19 | 0   | 1   | 0   | 0           |
| WCG                        | 20      | 65%     | 0 | 1  | 4  | 0  | 13  | 1   | 1   | 0           |
| WCT                        | 20      | 50%     | 0 | 2  | 0  | 3  | 2   | 10  | 3   | 0           |
| WTG                        | 20      | 75%     | 0 | 0  | 0  | 4  | 0   | 1   | 15  | 0           |
| Total                      | 127     | 78.7%   | 7 | 22 | 21 | 26 | 19  | 13  | 19  | 0           |
| Test set                   |         |         |   |    |    |    |     |     |     |             |
| W                          | 4       | 100%    | 4 | 0  | 0  | 0  | 0   | 0   | 0   | 0           |
| WC                         | 10      | 100%    | 0 | 10 | 0  | 0  | 0   | 0   | 0   | 0           |
| WG                         | 10      | 90%     | 0 | 0  | 9  | 0  | 1   | 0   | 0   | 0           |
| WT                         | 10      | 90%     | 0 | 0  | 0  | 9  | 0   | 0   | 1   | 0           |
| WCG                        | 10      | 90%     | 0 | 0  | 0  | 0  | 9   | 0   | 1   | 0           |
| WCT                        | 10      | 40%     | 0 | 3  | 0  | 2  | 1   | 4   | 0   | 0           |
| WTG                        | 10      | 70%     | 0 | 0  | 0  | 2  | 1   | 0   | 7   | 0           |
| Total                      | 64      | 81.3%   | 4 | 13 | 9  | 13 | 12  | 4   | 9   | 0           |

**Table S3.** The classification performance parameters of PLS-DA model with full-spectra. The values before the diagonal line belong to the training set, and the values after the diagonal line are for the test set. This also applies to Table S4-S7.

|                    | W           | WC          | WG         | WT          | WCG         | WCT        | WTG         |
|--------------------|-------------|-------------|------------|-------------|-------------|------------|-------------|
| Sensitivity        | 100%/100%   | 95%/100%    | 85%/90%    | 95%/90%     | 65%/90%     | 50%/40%    | 75%/70%     |
| Specificity        | 100%/100%   | 97.2%/94.4% | 96.3%/100% | 93.5%/92.6% | 94.4%/94.4% | 97.2%/100% | 96.3%/96.3% |
| Precision          | 100%/100%   | 86.4%/76.9% | 81.0%/100% | 73.1%/69.2% | 68.4%/75.0% | 76.9%/100% | 78.9%/77.8% |
| Accuracy           | 78.7%/81.3% |             |            |             |             |            |             |
| NO-error rate      | 80.7%/82.3% |             |            |             |             |            |             |
| Error rate         | 19.3%/17.7% |             |            |             |             |            |             |
| Younden’s index    | 100%/100%   | 92.2%/94.4% | 81.3%/90%  | 88.5%/82.6% | 59.4%/84.4% | 47.2%/40%  | 71.3%/66.3% |
| AUC (training set) | 1.00        | 0.99        | 0.96       | 0.97        | 0.96        | 0.86       | 0.92        |

**Table S4.** Classification predictions results and number of components of PLS-DA model with 500-1100 cm<sup>-1</sup> spectral regions.

|                                   | Members | Correct | W | WC | WG | WT | WCG | WCT | WTG | No class |
|-----------------------------------|---------|---------|---|----|----|----|-----|-----|-----|----------|
| <b>Number of latent variables</b> |         |         |   |    |    |    |     |     |     |          |
| <b>8</b>                          |         |         |   |    |    |    |     |     |     |          |
| <b>Training set</b>               |         |         |   |    |    |    |     |     |     |          |
| W                                 | 7       | 100%    | 7 | 0  | 0  | 0  | 0   | 0   | 0   | 0        |
| WC                                | 20      | 100%    | 0 | 20 | 0  | 0  | 0   | 0   | 0   | 0        |
| WG                                | 20      | 80%     | 0 | 0  | 16 | 0  | 2   | 0   | 2   | 0        |
| WT                                | 20      | 95%     | 0 | 0  | 0  | 19 | 0   | 1   | 0   | 0        |
| WCG                               | 20      | 80%     | 0 | 1  | 2  | 0  | 16  | 0   | 1   | 0        |
| WCT                               | 20      | 75%     | 0 | 1  | 1  | 2  | 0   | 15  | 1   | 0        |
| WTG                               | 20      | 65%     | 0 | 0  | 2  | 1  | 2   | 2   | 13  | 0        |
| Total                             | 127     | 83.5%   | 7 | 22 | 21 | 22 | 20  | 18  | 17  | 0        |
| <b>Test set</b>                   |         |         |   |    |    |    |     |     |     |          |
| W                                 | 4       | 100%    | 4 | 0  | 0  | 0  | 0   | 0   | 0   | 0        |
| WC                                | 10      | 100%    | 0 | 10 | 0  | 0  | 0   | 0   | 0   | 0        |
| WG                                | 10      | 80%     | 1 | 0  | 8  | 0  | 0   | 0   | 1   | 0        |
| WT                                | 10      | 90%     | 0 | 0  | 0  | 9  | 1   | 0   | 0   | 0        |
| WCG                               | 10      | 100%    | 0 | 0  | 0  | 0  | 10  | 0   | 0   | 0        |
| WCT                               | 10      | 60%     | 0 | 2  | 0  | 1  | 1   | 6   | 0   | 0        |
| WTG                               | 10      | 60%     | 0 | 0  | 2  | 1  | 1   | 0   | 6   | 0        |
| Total                             | 64      | 82.8%   | 5 | 12 | 10 | 11 | 13  | 6   | 7   | 0        |

**Table S5.** The classification performance parameters of PLS-DA model with 500-1100 cm<sup>-1</sup> spectral regions.

|                            | W            | WC          | WG          | WT          | WCG         | WCT        | WTG         |
|----------------------------|--------------|-------------|-------------|-------------|-------------|------------|-------------|
| <b>Sensitivity</b>         | 100%/100%    | 100%/100%   | 80%/80%     | 95%/90%     | 80%/100%    | 75%/60%    | 65%/60%     |
| <b>Specificity</b>         | 100%/98.3%   | 98.1%/96.3% | 95.3%/96.3% | 97.2%/96.3% | 96.3%/94.4% | 97.2%/100% | 96.3%/98.1% |
| <b>Precision</b>           | 100%/80.0%   | 90.9%/83.3% | 76.2%/80.0% | 86.4%/81.8% | 80.0%/76.9% | 83.3%/100% | 76.5%/85.7% |
| <b>Accuracy</b>            | 83.5%/82.8%  |             |             |             |             |            |             |
| <b>No-error rate</b>       | 85.0%/84.3%  |             |             |             |             |            |             |
| <b>Error rate</b>          | 15.0%%/15.7% |             |             |             |             |            |             |
| <b>Younden's index</b>     | 100%/98.3%   | 98.1%/96.3% | 75.3%/76.3% | 92.2%/86.3% | 76.3%/94.4% | 72.2%/60%  | 61.3%/58.1% |
| <b>AUC ( training set)</b> | 1.00         | 0.99        | 0.98        | 0.98        | 0.98        | 0.87       | 0.89        |
